# Supplementary material
Source: Royal Society of Chemistry journal article supplement (doi:10.1039/d6nr00649c)
Supplement: d6nr00649c1.pdf [file d6nr00649c1.pdf]

## Supplementary Information

### **Simultaneous 100% PLQY of Mn<sup>2+</sup> Emission and High Pb Substitution via Sr<sup>2+</sup> Doping in Mn-CsPbCl<sub>3</sub> Nanocrystals**

*Yuyao Feng<sup>#</sup>, Wanling Mao<sup>#</sup>, Yucong Ji, Xinli Wu, Yujia Hou, Hong Zhu, Yikun He, Yuhui Dong\*, and Yousheng Zou\**

*MIIT Key Laboratory of Advanced Display Materials and Devices, Jiangsu Province Engineering Research Center of Quantum Dot Display, School of Materials Science and Engineering, Institute of Optoelectronics and Nanomaterials, Nanjing University of Science and Technology, Nanjing 210094, China*

\* Corresponding authors

E-mail: dong.yuhui@njust.edu.cn

E-mail: yshzou75@njust.edu.cn

<sup>#</sup> These authors contribute equally to this work

## **Experimental and characterization**

### **2.1 Materials**

Lead (II) chloride ( $\text{PbCl}_2$ , 99.99%), manganese chloride ( $\text{MnCl}_2$ , 99.99%), strontium chloride ( $\text{SrCl}_2$ , 99.99%), cesium carbonate ( $\text{Cs}_2\text{CO}_3$ , 99.9%) were purchased from Macklin, oleylamine (OLA, 85%), oleic acid (OA, 85%), 1-octadecene (ODE, 90%), n-hexane (99.9%), ethyl acetate (99.9%), Methyl methacrylate (PMMA, 99%) were purchased from Aladdin.

### **2.2. Preparation of the Cs-OA precursor**

This synthetic method has been reported in our previous work.<sup>1</sup> A mixture of 0.814 g  $\text{Cs}_2\text{CO}_3$ , 30 mL ODE, and 3 mL OA was added to a 100 mL three-necked flask. The entire reaction was carried out under constant stirring in a nitrogen atmosphere. The solution was heated from 20 °C to 120 °C and held at that temperature for 60 minutes to remove residual water and oxygen. Subsequently, the temperature was increased to 150 °C and maintained for 30 minutes. A transparent-to-pale yellow color change indicated the successful formation of the precursor solution.

### **2.3. Synthesis of Mn-CsPbCl<sub>3</sub> NCs**

This synthetic method has been reported in our previous work.<sup>1</sup> A mixture of 0.6 mmol of  $\text{MnCl}_2/\text{PbCl}_2$  (The molar ratio of  $\text{MnCl}_2$  to  $\text{PbCl}_2$  was between 3:7 and 8:2), 10 mL of ODE, 1.5 mL OA and 1.5 mL OLA was added to a 100 mL three-neck flask. The reaction solution was maintained at 80 °C, 100 °C, and 120 °C for 20 minutes at each temperature. Then, three evacuation-nitrogen purge cycles were performed to ensure an inert atmosphere. Finally, the solution was heated to the target reaction temperature (170 - 200 °C), followed by rapid injection of 1.2 mL of Cs-oleate solution preheated to 150 °C. After reacting for 5 seconds, the mixture was immediately cooled using an ice-water bath to quench the reaction.

### **2.4. Synthesis of Mn/Sr-CsPbCl<sub>3</sub> NCs**

Similar to the above process, to investigate the effect of the Sr/Pb feeding ratio on  $\text{Mn}^{2+}/\text{Sr}^{2+}$  co-doped  $\text{CsPbCl}_3$  NCs, the molar ratio of  $\text{MnCl}_2$  to  $\text{PbCl}_2$  was maintained at a constant 6:4, while a strontium source ( $\text{SrCl}_2$ ) was introduced into the three-neck flask at  $\text{SrCl}_2/\text{PbCl}_2$  molar ratios ranging from 10% to 60%. To investigate the effect of the Mn/Pb feeding ratio on  $\text{Mn}^{2+}/\text{Sr}^{2+}$  co-doped  $\text{CsPbCl}_3$  NCs, the  $\text{SrCl}_2/\text{PbCl}_2$  molar ratio was maintained at a constant 30%, while the  $\text{MnCl}_2/\text{PbCl}_2$  molar ratio was varied between 3:7 and 8:2.

### **2.5. Purification of NCs**

The crude solution was transferred to a centrifuge tube. Then, 10 mL n-hexane and 20 mL ethyl acetate were added to induce precipitation. The mixture was centrifuged at 8000 rpm for 3 min to removed unreacted precursors. The resulting precipitate was redispersed in 10 mL of n-hexane, forming a stable colloidal solution for subsequent characterization.

## **2.6. Fabrication of the WLED device**

0.5 g of PMMA was dissolved in 2 mL of toluene. 2000  $\mu\text{L}$  of the Mn/Sr-CsPbCl<sub>3</sub> NCs toluene dispersion solution was added to PMMA/ toluene solution, and the mixture was blade-coated uniformly at a controlled thickness of 1000  $\mu\text{m}$ , then dried in an oven at 60 °C for 3 hours, yielding a Mn<sup>2+</sup>/Sr<sup>2+</sup> co-doped CsPbCl<sub>3</sub> NC-PMMA composite film. The preparation process of CsPb(Cl,Br)<sub>3</sub> and CsPbBr<sub>3</sub> NC-PMMA composite films were similar to the above process. Finally, these films were applied onto a commercial 365 nm UV-LED chip, WLED devices were fabricated.

## **2.7 Characterization**

The absorption of NCs was done by a SHIMADZU UV3600 UV-vis-NIR spectrophotometer. Photoluminescence (PL) spectra and photoluminescence excitation (PLE) spectra were acquired using an Agilent Cary Eclipse fluorescence spectrophotometer. The photoluminescence quantum yield (PLQY) was determined with a Hamamatsu Quantaurus-QY C11347-11 integrated fluorescence quantum yield measurement system featuring an integrating sphere. X-ray diffraction (XRD) patterns were collected over by a Bruker D8 Advance X-ray diffractometer. Elemental composition and chemical states were analyzed by X-ray photoelectron spectroscopy (XPS) on a ULVAC-PHI instrument. The transmission electron microscopy (TEM), high-resolution TEM (HR-TEM), and energy-dispersive X-ray spectroscopy (EDS) analysis were performed on a JEOL JEM-2100F microscope. Time-resolved photoluminescence (TRPL) decays were recorded on a Horiba FluoroMax system configured for high/low-temperature transient fluorescence and absorption measurements. The relative proportions of B-site ions were quantified by inductively coupled plasma optical emission spectrometry (ICP-OES) on a Thermo Scientific iCAP Pro series instrument. The optoelectronic characteristics of the resulting LEDs were evaluated using an OLED-1000 comprehensive photoelectric measurement system.

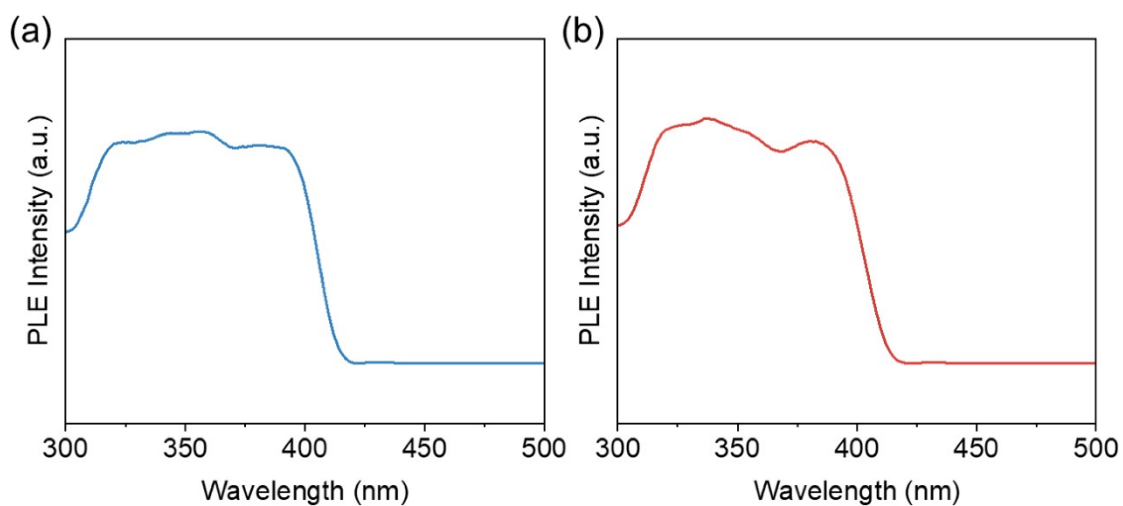

**Fig. S1** PLE ( $\lambda_{em} = 600$  nm) spectra of (a) Mn-CspbCl<sub>3</sub> NCs and (b) Mn/Sr-CspbCl<sub>3</sub> NCs.

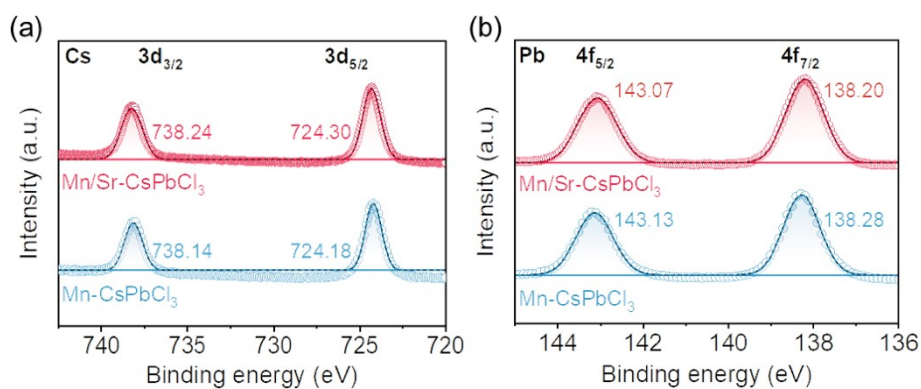

**Fig. S2** High-resolution XPS spectra of Mn-CspbCl<sub>3</sub> and Mn/Sr-CspbCl<sub>3</sub> for (a) Cs and (b) Pb, respectively.

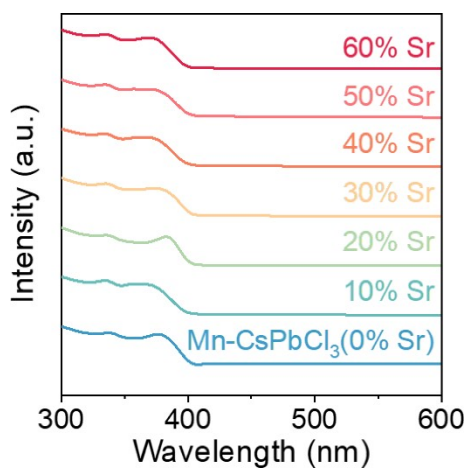

**Fig. S3** Absorption spectra of Mn/Sr-CspbCl<sub>3</sub> NCs synthesized with different Sr/Pb feed ratios.

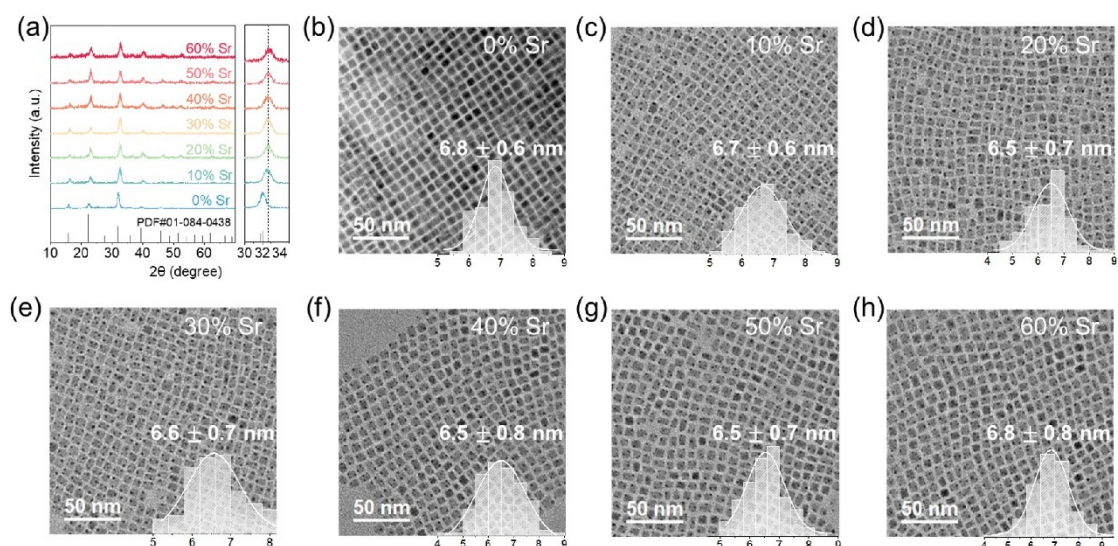

**Fig. S4** (a) XRD patterns, (b)-(h)TEM images and corresponding size distribution histograms of Mn/Sr-CsPbCl<sub>3</sub> NCs prepared with different Sr/Pb feed ratios.

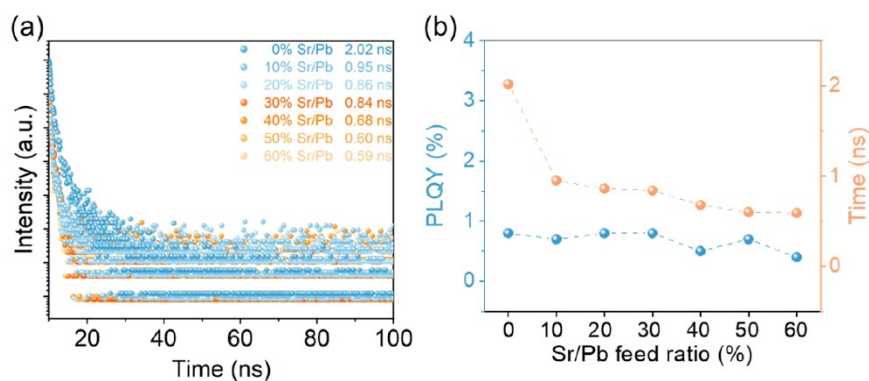

**Fig. S5** (a) TRPL decays of excitonic emission, (b) excitonic emission PLQY and average lifetime as a function of Sr/Pb feed ratio (0% - 60%).

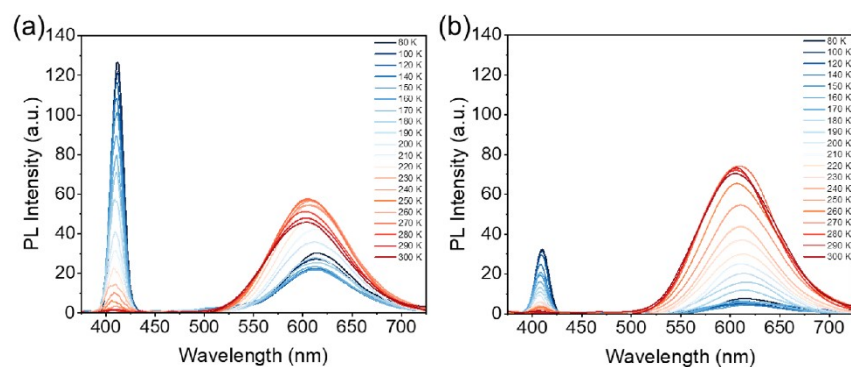

**Fig. S6** Temperature-dependent PL spectra of (a) Mn -CsPbCl<sub>3</sub> NCs and (b) Mn/Sr-CsPbCl<sub>3</sub> NCs.

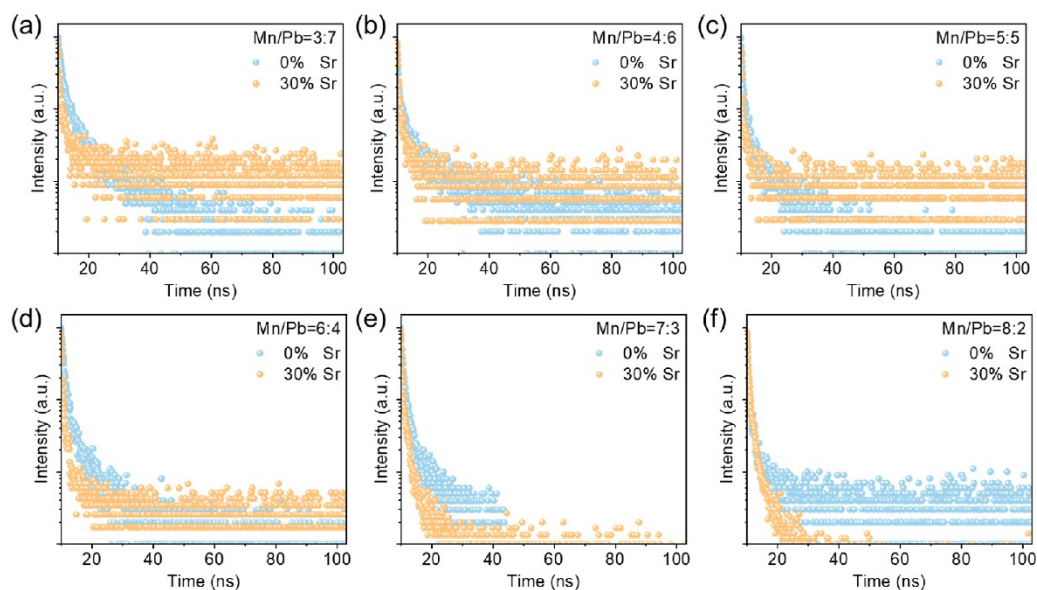

**Fig. S7** Comparative TRPL decays of excitonic emission from Mn-CsPbCl<sub>3</sub> NCs and Mn/Sr-CsPbCl<sub>3</sub> NCs (30% Sr/Pb feed ratio) at different Mn/Pb feed ratios: (a) 3:7, (b) 4:6, (c) 5:5, (d) 6:4, (e) 7:3, (f) 8:2.

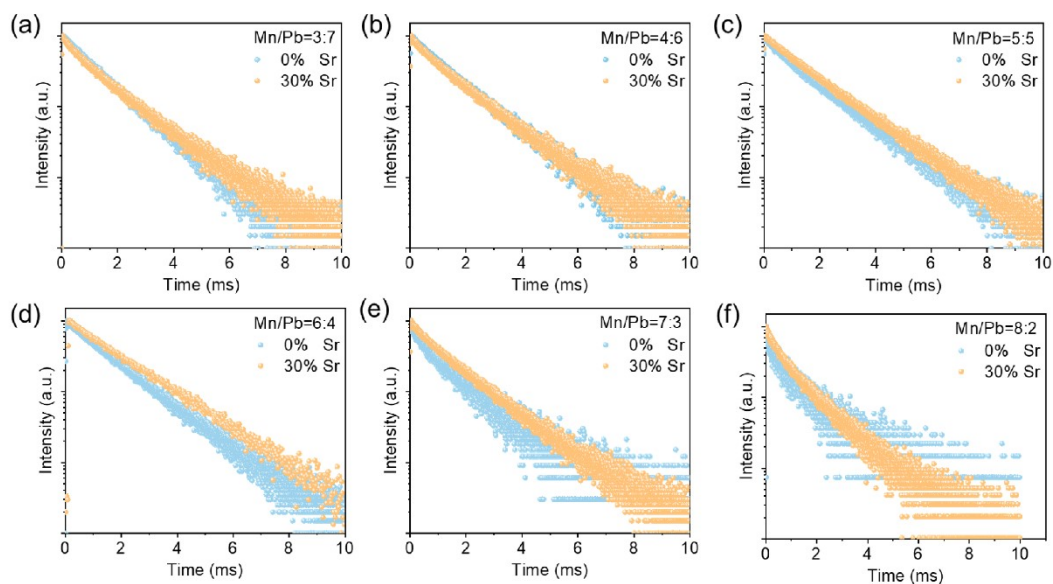

**Fig. S8** Comparative TRPL decays of Mn<sup>2+</sup> emission from Mn-CsPbCl<sub>3</sub> NCs and Mn/Sr-CsPbCl<sub>3</sub> NCs (30% Sr/Pb feed ratio) at different Mn/Pb feed ratios: (a) 3:7, (b) 4:6, (c) 5:5, (d) 6:4, (e) 7:3, (f) 8:2.

**Table S1.** Summary of key performance parameters of the Mn<sup>2+</sup> co-doped CsPbCl<sub>3</sub> NCs with different metal ions in previous studies.

| Metal ion              | PLQY for Mn <sup>2+</sup> ions (%) | Pb substitution level (%) | Synthesis Method     | Reference        |
|------------------------|------------------------------------|---------------------------|----------------------|------------------|
| <b>Sr<sup>2+</sup></b> | <b>100</b>                         | <b>18.58</b>              | <b>Hot-injection</b> | <b>This work</b> |
| Sr <sup>2+</sup>       | 49.1                               | 0.26                      | Hot-injection        | Ref 2            |
| Sr <sup>2+</sup>       | 72.83                              | 2.96                      | Hot-injection        | Ref 3            |
| Mg <sup>2+</sup>       | 61.14                              | 7.04                      | Hot-injection        | Ref 3            |
| Ca <sup>2+</sup>       | 57.80                              | 3.18                      | Hot-injection        | Ref 3            |
| Ba <sup>2+</sup>       | 40.38                              | 2.21                      | Hot-injection        | Ref 3            |
| Fe <sup>2+</sup>       | 27                                 | -                         | Hot-injection        | Ref 4            |
| Ni <sup>2+</sup>       | 70                                 | 5.15                      | Hot-injection        | Ref 5            |
| Cu <sup>2+</sup>       | 63                                 | 5.24                      | Hot-injection        | Ref 6            |
| Zn <sup>2+</sup>       | 51.2                               | -                         | Ultrasonic           | Ref 7            |
| Co <sup>2+</sup>       | 30                                 | 4.9                       | Hot-injection        | Ref 8            |

**Table S2.** The TRPL fitting parameters of exciton emission of Mn/Sr-CsPbCl<sub>3</sub> NCs.

| Sample              | $\tau_{1/ns}$ | $\tau_{2/ns}$ | A <sub>1</sub> | A <sub>2</sub> | $\tau/ns$ | w <sub>1</sub> % | w <sub>2</sub> % | PLQY |
|---------------------|---------------|---------------|----------------|----------------|-----------|------------------|------------------|------|
| CsPbCl <sub>3</sub> | 2.924         | 12.009        | 796.544        | 153.248        | 6.93      | 55.86            | 44.14            | 0.5% |
| Mn-doped            | 0.796         | 5.269         | 1186           | 68.116         | 2.02      | 72.45            | 27.55            | 0.8% |
| 10% Sr              | 0.417         | 4.134         | 1661.4         | 28.186         | 0.95      | 85.60            | 14.40            | 0.7% |
| 20% Sr              | 0.420         | 3.838         | 1709.79        | 27.466         | 0.86      | 87.20            | 12.80            | 0.8% |
| 30% Sr              | 0.494         | 3.292         | 1705.45        | 36.1397        | 0.84      | 87.63            | 12.37            | 0.8% |
| 40% Sr              | 0.381         | 2.424         | 1717.76        | 46.955         | 0.68      | 85.19            | 14.81            | 0.5% |
| 50% Sr              | 0.398         | 1.891         | 1821.55        | 59.258         | 0.60      | 86.61            | 13.39            | 0.7  |
| 60% Sr              | 0.384         | 2.093         | 1731.97        | 44.114         | 0.59      | 87.81            | 12.19            | 0.4  |

**Table S3.** The TRPL fitting parameters of Mn emission of Mn/Sr-CsPbCl<sub>3</sub> NCs.

| Sample | $\tau_1/\text{ms}$ | $\tau_2/\text{ms}$ | A <sub>1</sub> | A <sub>2</sub> | $\tau/\text{ms}$ | w <sub>1</sub> % | w <sub>2</sub> % | PLQY  |
|--------|--------------------|--------------------|----------------|----------------|------------------|------------------|------------------|-------|
| 0% Sr  | 0.668              | 1.492              | 270.005        | 1697.057       | 1.44             | 6.65             | 93.35            | 85.8% |
| 10% Sr | 0.784              | 1.463              | 149.161        | 1383.994       | 1.43             | 5.46             | 94.54            | 96.6% |
| 20% Sr | 0.360              | 1.494              | 277.595        | 1226.541       | 1.44             | 5.18             | 94.82            | 93.4% |
| 30% Sr | 0.472              | 1.759              | 270.836        | 2691.539       | 1.73             | 2.63             | 97.37            | 100%  |
| 40% Sr | 0.548              | 1.721              | 393.499        | 2652.896       | 1.67             | 4.51             | 95.49            | 100%  |
| 50% Sr | 0.581              | 1.658              | 279.481        | 1630.806       | 1.60             | 5.67             | 94.33            | 100%  |
| 60% Sr | 0.369              | 1.648              | 375.489        | 1548.684       | 1.58             | 5.15             | 94.85            | 92.5% |

Lattice strain of the NCs was calculated via the Williamson-Hall (W-H) method (Equation (S1)), with results listed in Table S3.

$$\beta \cos \theta = \frac{kD}{\lambda} + 4\epsilon \sin \theta \quad (\text{S1})$$

Specifically, D,  $\lambda$ ,  $\beta$ ,  $\theta$ , and the constant k (k=0.9) correspond to crystallite size, radiation wavelength, FWHM, peak position, and a constant, respectively, while  $\epsilon$  represents the lattice microstrain.<sup>9</sup>

**Table S4.** Calculated microstrain ( $\epsilon$ ) and linear fit parameters of NCs from W-H plots.

| Sample                    | Strain, $\epsilon$ | Standard error, E | R value | Adj R <sup>2</sup> | R <sup>2</sup> (COD) | Root MSE (SD) |
|---------------------------|--------------------|-------------------|---------|--------------------|----------------------|---------------|
| Mn/Sr-CsPbCl <sub>3</sub> | 0.00808            | 0.000902          | 0.96818 | 0.90607            | 0.93738              | 0.000636      |
| Mn-CsPbCl <sub>3</sub>    | 0.01204            | 0.001646          | 0.93944 | 0.82384            | 0.88256              | 0.001164      |

**Table S5.** The TRPL fitting parameters of exciton emission of Mn-CsPbCl<sub>3</sub> NCs with different Mn/Pb feed ratios.

| Sample | $\tau_1/\text{ns}$ | $\tau_2/\text{ns}$ | $A_1$    | $A_2$   | $\tau/\text{ns}$ | $w_1\%$ | $w_2\%$ | PLQY |
|--------|--------------------|--------------------|----------|---------|------------------|---------|---------|------|
| 3:7    | 1.181              | 8.057              | 1116.98  | 115.226 | 4.02             | 58.69   | 41.31   | 0.8% |
| 4:6    | 0.544              | 7.910              | 1216.640 | 66.111  | 3.79             | 55.86   | 44.14   | 0.7% |
| 5:5    | 0.592              | 6.460              | 1282.240 | 52.840  | 2.41             | 68.98   | 31.02   | 0.4% |
| 6:4    | 0.796              | 5.269              | 1186     | 68.116  | 2.02             | 72.45   | 27.55   | 0.8% |
| 7:3    | 0.582              | 3.198              | 1080.540 | 108.164 | 1.51             | 64.51   | 35.49   | 0.5% |
| 8:2    | 0.467              | 5.444              | 1394.1   | 30.227  | 1.47             | 79.82   | 20.18   | 0.3% |

**Table S6.** The TRPL fitting parameters of exciton emission of Mn/Sr-CsPbCl<sub>3</sub> NCs with different Mn/Pb feed ratios (30 % Sr/Pb feed ratio).

| Sample | $\tau_1/\text{ns}$ | $\tau_2/\text{ns}$ | $A_1$    | $A_2$   | $\tau/\text{ns}$ | $w_1\%$ | $w_2\%$ | PLQY |
|--------|--------------------|--------------------|----------|---------|------------------|---------|---------|------|
| 3:7+Sr | 0.557              | 5.120              | 433.530  | 18.177  | 1.83             | 72.19   | 27.81   | 0.8% |
| 4:6+Sr | 0.493              | 3.489              | 517.518  | 25.547  | 1.27             | 74.12   | 25.88   | 0.6% |
| 5:5+Sr | 0.388              | 2.171              | 512.889  | 20.202  | 0.71             | 81.93   | 18.07   | 0.4% |
| 6:4+Sr | 0.494              | 3.292              | 1705.45  | 36.1397 | 0.84             | 87.63   | 12.37   | 0.8% |
| 7:3+Sr | 0.512              | 3.142              | 4238.660 | 99.271  | 0.84             | 87.43   | 12.57   | 0.5% |
| 8:2+Sr | 0.527              | 2.989              | 6263.580 | 246.948 | 0.84             | 81.72   | 18.28   | 0.6% |

**Table S7.** The TRPL fitting parameters of Mn emission of Mn-CsPbCl<sub>3</sub> NCs with different Mn/Pb feed ratios.

| Sample | $\tau_1/\text{ms}$ | $\tau_2/\text{ms}$ | $A_1$    | $A_2$    | $\tau/\text{ms}$ | $w_1\%$ | $w_2\%$ | PLQY  |
|--------|--------------------|--------------------|----------|----------|------------------|---------|---------|-------|
| 3:7    | 0.736              | 1.308              | 513.161  | 1427.152 | 1.21             | 16.83   | 83.17   | 0.7%  |
| 4:6    | 0.616              | 1.432              | 419.640  | 1463.871 | 1.34             | 10.98   | 89.02   | 22.3% |
| 5:5    | 0.522              | 1.545              | 489.458  | 1348.956 | 1.43             | 10.92   | 89.08   | 30.6% |
| 6:4    | 0.668              | 1.492              | 270.005  | 1697.057 | 1.44             | 6.65    | 93.35   | 85.8% |
| 7:3    | 0.180              | 1.266              | 142.378  | 194.748  | 1.16             | 9.42    | 90.58   | 63.8% |
| 8:2    | 0.002              | 1.012              | 3125.675 | 71.679   | 0.93             | 7.93    | 92.07   | 59.3% |

**Table S8.** The TRPL fitting parameters of Mn emission of Mn/Sr-CsPbCl<sub>3</sub> NCs with different Mn/Pb feed ratios (30 % Sr/Pb feed ratio).

| <b>Sample</b> | $\tau_1/\text{ms}$ | $\tau_2/\text{ms}$ | $A_1$   | $A_2$    | $\tau/\text{ms}$ | $w_1\%$ | $w_2\%$ | <b>PLQY</b> |
|---------------|--------------------|--------------------|---------|----------|------------------|---------|---------|-------------|
| 3:7+Sr        | 0.539              | 1.512              | 657.743 | 1186.230 | 1.25             | 16.51   | 83.49   | 15.2%       |
| 4:6+Sr        | 0.474              | 1.472              | 461.464 | 1376.766 | 1.38             | 9.74    | 90.26   | 49.2%       |
| 5:5+Sr        | 0.431              | 1.561              | 431.443 | 1199.628 | 1.46             | 8.56    | 91.43   | 58.1%       |
| 6:4+Sr        | 0.472              | 1.759              | 270.836 | 2691.539 | 1.73             | 2.63    | 97.37   | 100%        |
| 7:3+Sr        | 0.452              | 1.432              | 721.722 | 1145.318 | 1.27             | 16.57   | 83.43   | 77.5%       |
| 8:2+Sr        | 0.376              | 1.265              | 404.672 | 472.154  | 1.08             | 20.31   | 79.69   | 70.9%       |

## References

1. X. L. Wu, W. C. Qi, H. Zhu, Y. H. Dong, A. C. Jiang, H. Y. Chen, H. T. Huang, L. Han and Y. S. Zou, *Opt. Mater.*, 2025, **167**, 117250.
2. H. Yuce, M. Mandal, Y. Yalcinkaya, D. Andrienko and M. M. Demir, *J. Phys. Chem. C*, 2022, **126**, 11277–11284.
3. K. Xing, S. Cao, Y. S. Song, Q. Y. Li and J. L. Zhao, *Mater. Res. Bull.*, 2024, **170**, 112599.
4. A. Banjare, D. Patra, K. Narayanaswamy, M. K. Ravva, R. S. Singh, S. P. Singh and A. K. Singh, *ACS Appl. Nano Mater.*, 2025, **8**, 13372-13380.
5. K. Xing, X. Yuan, Y. Wang, J. Li, Y. J. Wang, Y. Fan, L. Yuan, K. Li, Z. J. Wu, H. B. Li and J. L. Zhao, *J. Phys. Chem. Lett.*, 2019, **10**, 4177-4184.
6. Y. Z. Zheng, X. Yuan, J. Yang, Q. Y. Li, X. X. Yang, Y. Fan, H. B. Li, H. L. Liu and J. L. Zhao, *J. Lumin.*, 2020, **227**, 117586.
7. L. Fang, D. F. Luo, J. Zhang, F. K. Wang, J. Y. Zhang, Z. H. Zheng, Z. Q. Xu and G. B. Huang, *Opt. Mater.*, 2025, **161**, 116823.
8. Z. Cao, J. Li, L. Wang, K. Xing, X. Yuan, J. L. Zhao, X. Gao and H. B. Li, *Mater. Res. Bull.*, 2020, **121**, 110608.
9. H. Yuce, M. Mandal, Y. Yalcinkaya, D. Andrienko and M. M. Demir, *J. Phys. Chem. C*, 2022, **126**, 11277-11284.
